# Supplementary material
Source: PubMed Central journal article supplement (PMC2786807)
Supplement: JCI40202sd.pdf [file JCI40202sd.pdf]

## Online supplemental material

*Supplemental Figure 1:* IL-22+ T cells comprise about one third “pure” Th22 cells.

A) Algorithm to calculate the relative frequency of Th22 cells within the cellular infiltrate of inflammatory skin diseases. A representative 4-color intracellular staining of skin-infiltrating T cells shows the relative frequency of IL-22+IL-17- and of IL-22+IL-17+ T cells, in the example 15,94% (I). The relative frequency of Th22 within total T cellular infiltrate is calculated as the percentage of IL-22+IL-17- cells (dot plot I, 7,4%) that are also negative for IFN- $\gamma$  and IL-4 (lower left quadrant of dot plot II, 41,2% of IL-22+IL-17- cells). The relative frequency of Th22 within total IL-22+ cells is calculated as Th22/total IL-22+ cells, in the shown example 19,1% (III). B) Relative frequency of Th22 cells within IL-22+ T cells in peripheral blood (PBMC, n=4), Psoriasis (PS, n=3), atopic eczema (AE, n=4) and contact dermatitis (ACD, n=4). Shown are mean percentages +/- standard error of the mean.

*Supplemental Figure 2:* Surface phenotype of Th22 clones. The surface phenotype of the Th22 clones shown in Figure 2 was further analysed by flow cytometry. Shown are representative flow cytometric stainings of clone 1(a), clone 2 (b) and clone 3 (c) in resting state (red lines) as compared to isotype control (blue lines).

*Supplemental Figure 3:* Th22 clones were cultured under Th1, Th2, Th17 and Treg conditions. 4 color-intracellular staining after PMA/ionomycin stimulation after 4 and 7 days shows that Th22 conserved a high secretion of IL-22 (x-axis of dot plots), but did not gain the capacity to produce substantial amounts of another lineage-indicating cytokine (y-axes of dot plots) despite a slight increase in IFN- $\gamma$ . Data shown are representative and show “clone 3” (Fig 2c).

*Supplemental Figure 4:* Th22 cells are stable and cannot be deformed into other T cell phenotypes. Freshly isolated Th22 cells are stable under different T helper subset-polarizing conditions. Th22 cells from peripheral blood of three different donors were enriched by isolating CD45RA-CCR10<sup>+</sup> T cells and cultured under Th1, Th2, Th17,

Th22 and Treg conditions. After 5 days, they were stimulated with anti-CD3/anti-CD28 for 48 hours, and cytokine content was measured by ELISA (a) or stimulated with PMA/Ionomycine and stained intracellularly (b). Cytokine content of cell-free supernatant is given in the y-axes. As recombinant cytokines were added, TNF- $\alpha$  under Th22 and IL-4 under Th2 conditions is not shown (marked with "X"). Shown are three independent experiments. Error bars indicate Standard error of the mean.

*Supplemental Table 1:* Quantity of distinct T cell phenotypes and plasticity of T cell subsets varies among inflammatory skin disorders. Shown are relative percentages of primary human T lymphocytes derived from psoriasis (n=3), AE (n=4), and ACD (n=4) that stain positive for IL-22, IL-17, IFN- $\gamma$  and IL-4 in 4 color-intracellular stainings, as shown in the Venn blot in figure 1f.

*Supplemental Table 2:* Primer sequences used for real time PCR analysis.

*Supplemental Table 3:* Bioinformatic extraction of genes up- or downregulated in Th22 clones (n = 3) in comparison to effector T cell clones (n = 5). Genes, which were at least two-fold up- or downregulated entered the analysis. The functional groups were filtered using the Biblioshere software (Genomatix). All tables were curated and corrected for double assignments.

*Supplemental Table 4:* Bioinformatic extraction of genes up- or downregulated in keratinocytes upon exposure to Th22 supernatants in comparison to medium. Genes that were at least two-fold up- or downregulated entered the analysis. The functional groups were filtered using the Biblioshere software (Genomatix). All tables were curated and corrected for double assignments.

Supplemental figure 1

A

I. Total IL-22+ cells

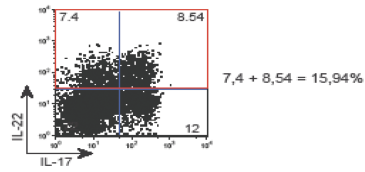

II. Fraction of Th22 cells on total T cells

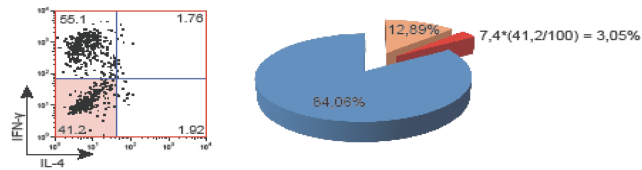

III. Fraction of Th22 cells on IL-22+ cells

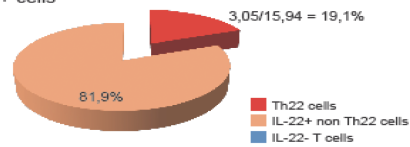

B

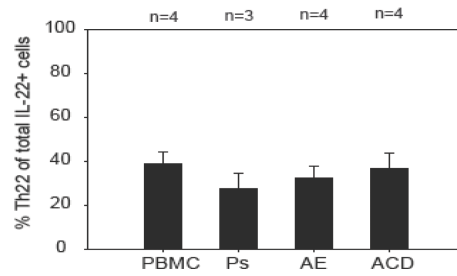

Supplemental Figure 2

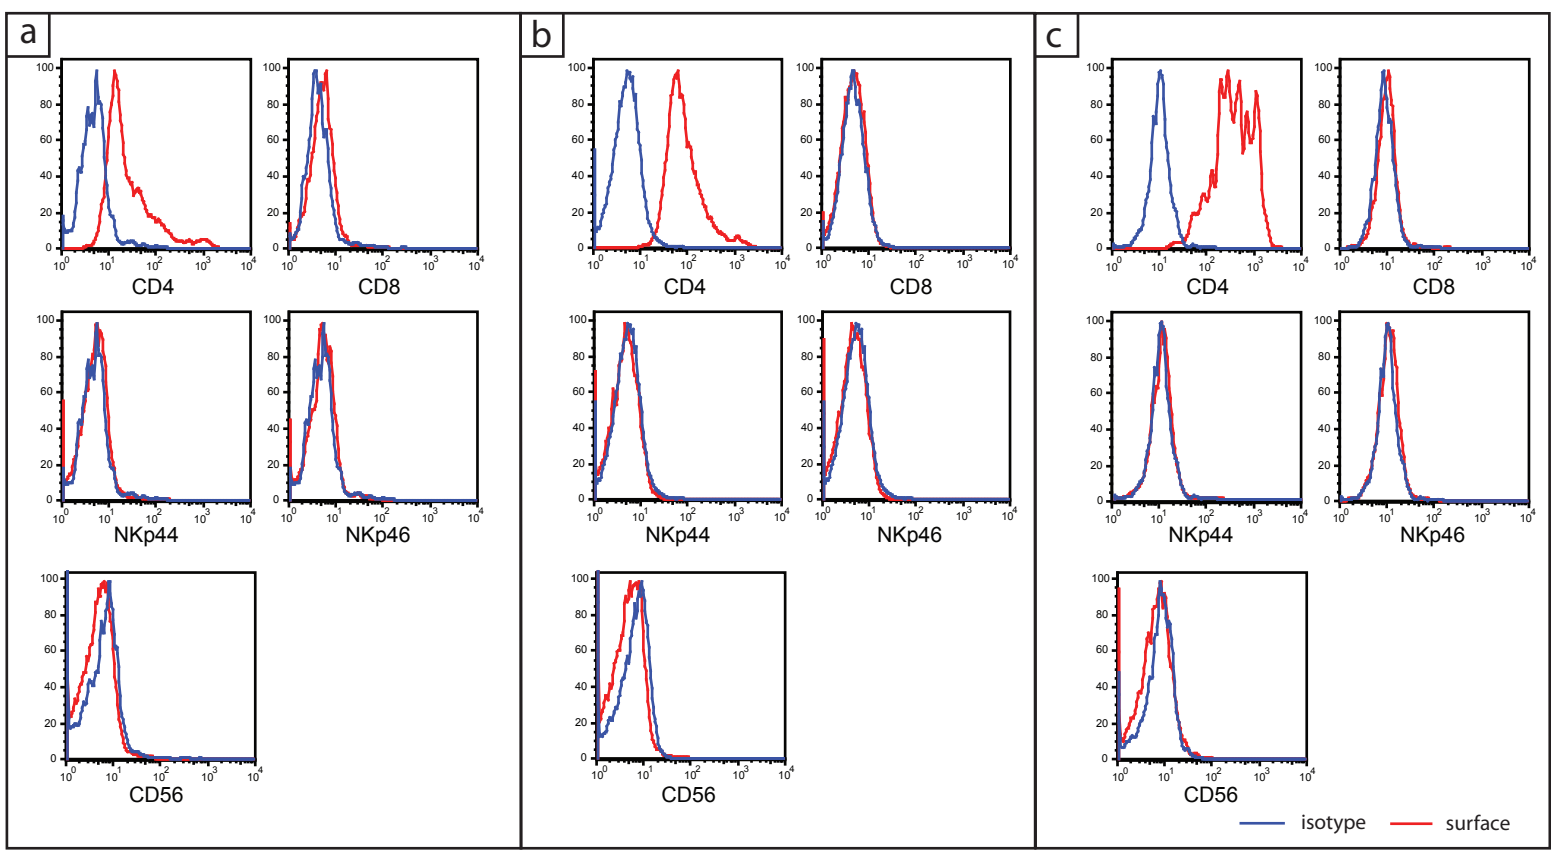

% of Max

### Th22 clones under deforming conditions

DAY 0

np conditions

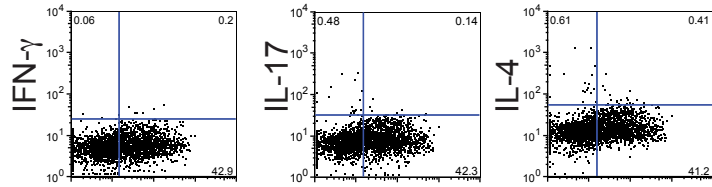

DAY 4

neutral conditions  
(medium)

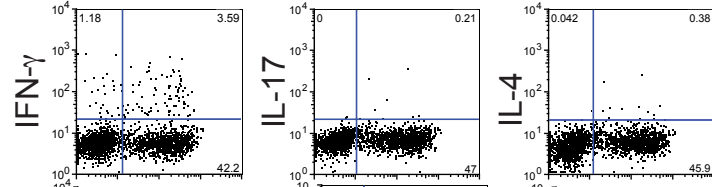

T<sub>H</sub>1 conditions  
(IL-12 +  $\alpha$ -IL-4)

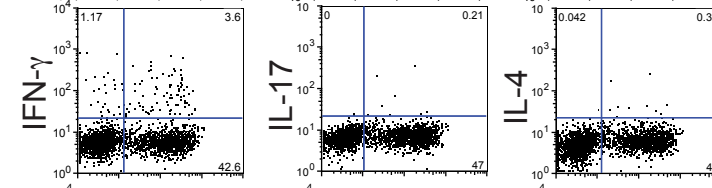

T<sub>H</sub>2 conditions  
(IL-4 +  $\alpha$ -IL-12)

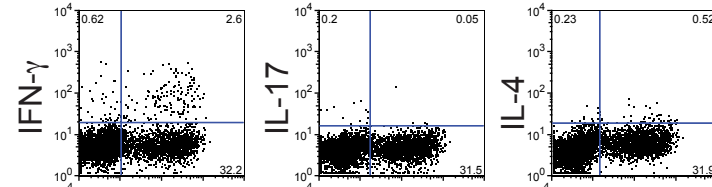

T<sub>H</sub>17 conditions  
(IL-1 $\beta$  + IL-6 +  $\alpha$ -IFN- $\gamma$  +  $\alpha$ -IL-4)

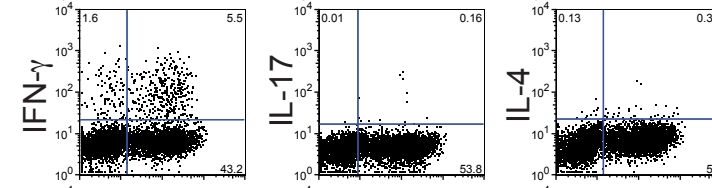

Treg conditions  
(TGF- $\beta$  +  $\alpha$ -IFN- $\gamma$  +  $\alpha$ -IL-4)

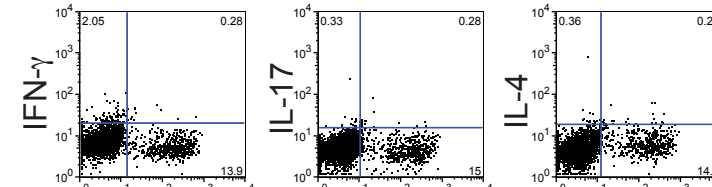

IL-22

IL-22

IL-22

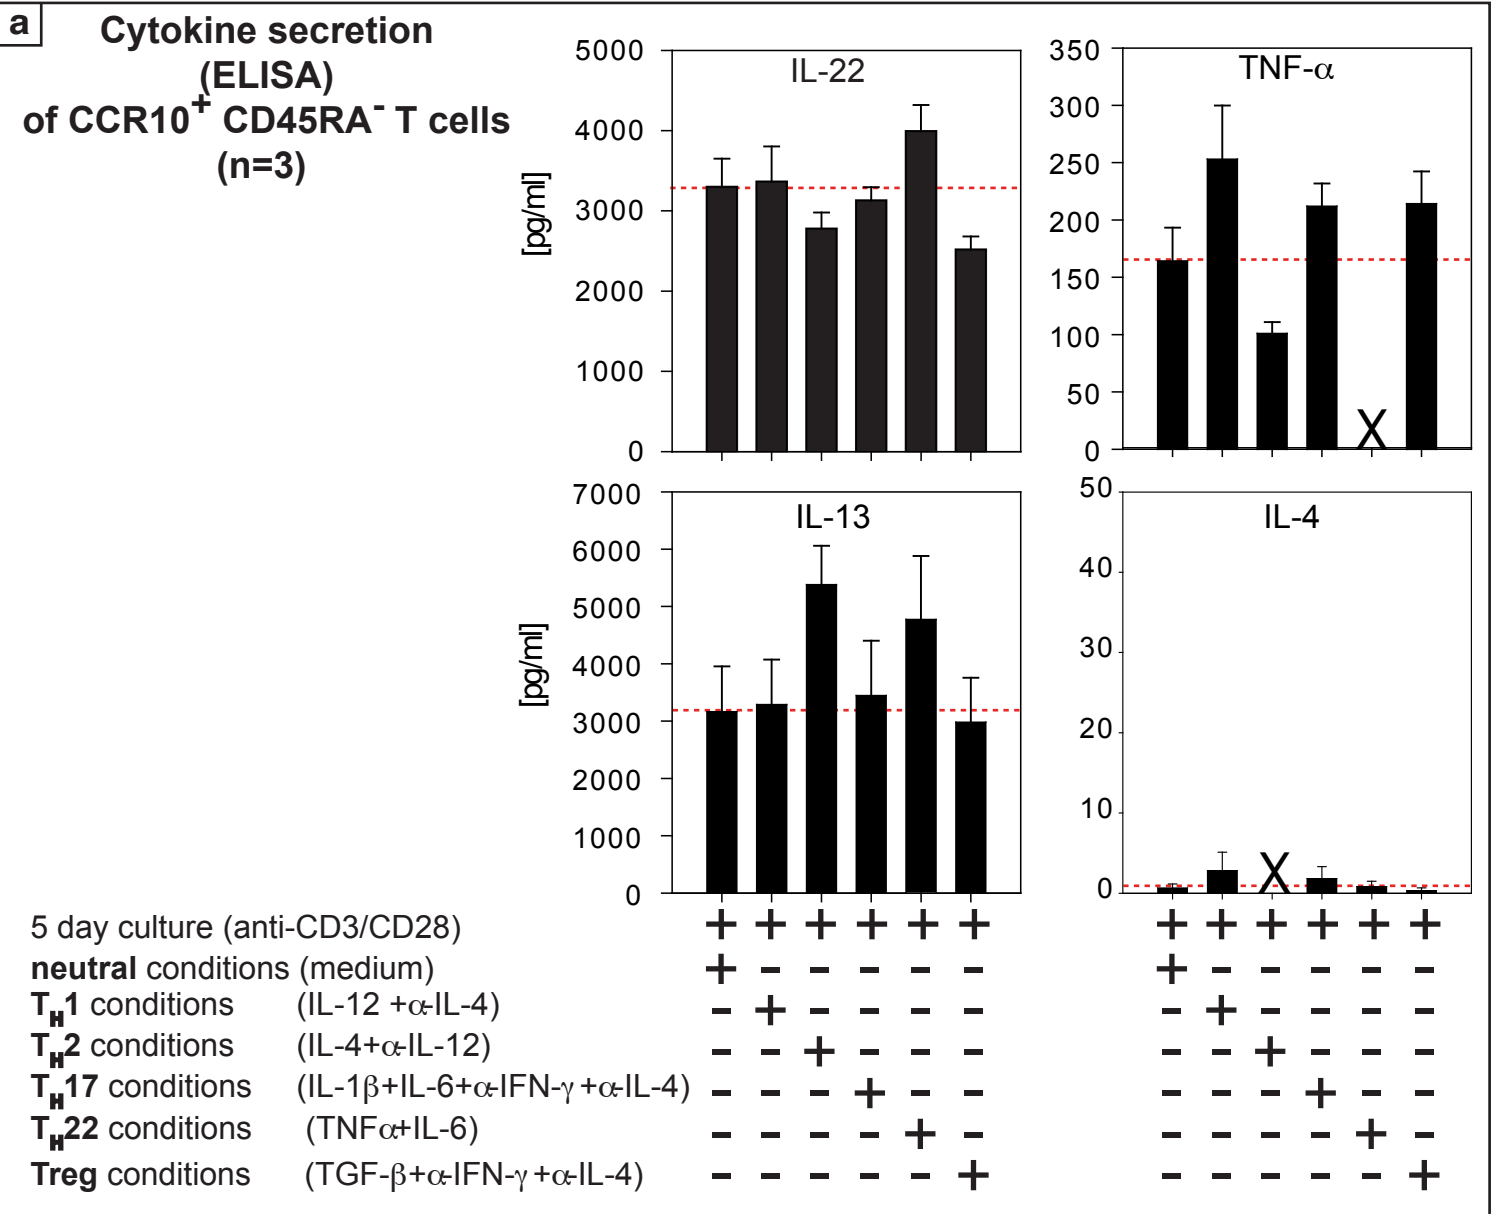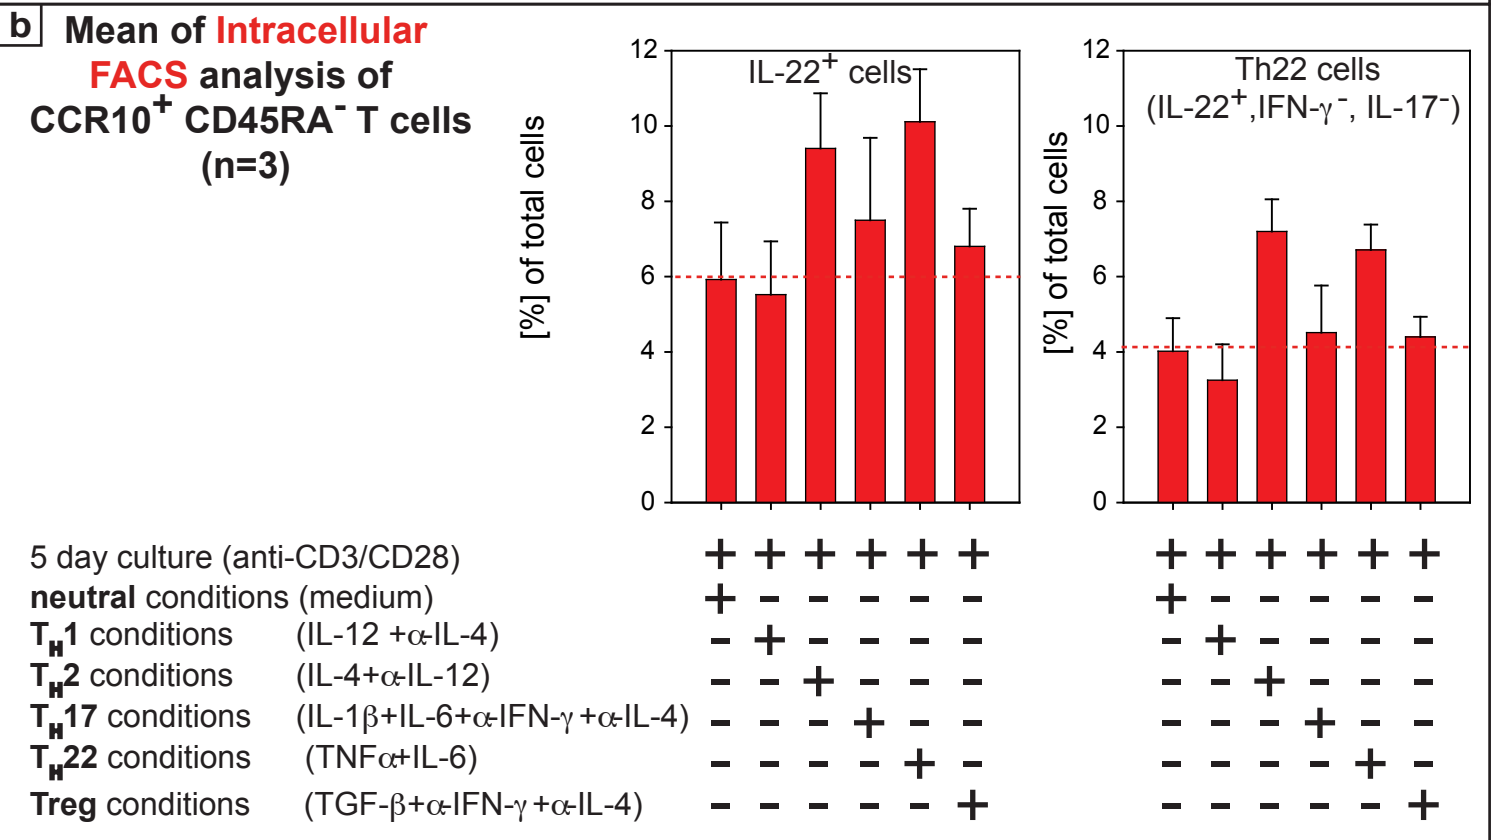

Supplemental Table 1

| % positive cells                | Psoriasis | Atopic Eczema | Contact Dermatitis |
|---------------------------------|-----------|---------------|--------------------|
| IFN- $\gamma$                   | 34.3      | 30.1          | 36.4               |
| IL-4                            | 5.3       | 30.5          | 15.6               |
| IL-17                           | 17.4      | 9.0           | 13.1               |
| IL-22                           | 15.9      | 12.1          | 13.7               |
| IFN- $\gamma$ /IL-4             | 2.6       | 9.5           | 6.3                |
| IFN- $\gamma$ /IL-17            | 9.1       | 4.6           | 6.2                |
| IFN- $\gamma$ /IL-22            | 9.2       | 3.9           | 5.4                |
| IL-4/IL-17                      | 1.0       | 2.1           | 1.1                |
| IL-4/IL-22                      | 0.3       | 1.2           | 0.4                |
| IL-17/IL-22                     | 9.4       | 2.1           | 4.4                |
| IFN- $\gamma$ /IL-4/IL-17       | 0.03      | 0.5           | 0.6                |
| IFN- $\gamma$ /IL-4/IL-22       | 0.05      | 0.4           | 0.2                |
| IFN- $\gamma$ /IL-17/IL-22      | 4.0       | 0.5           | 1.4                |
| IL-4/IL-17/IL-22                | 0.01      | 0.1           | 0.1                |
| IFN- $\gamma$ /IL-4/IL-17/IL-22 | 0.01      | 0.05          | 0.06               |

Supplemental Table 2

| <b>name</b> | <b>forward primer</b>       | <b>reverse primer</b>      |
|-------------|-----------------------------|----------------------------|
| CXCL9       | TCACATCTGCTGAATCTGGG        | CCTTAAACAATTTGCCCAA        |
| CXCL10      | GCTGATGCAGGTACAGCGT         | CACCATGAATCAAAGTGC         |
| CXCL11      | ATGCAAAGACAGCGTCCTCT        | CAAACATGAGTGTGAAGGGC       |
| CCL2        | AGGTGACTGGGGCATTGAT         | GCCTCCAGCATGAAAGTCTC       |
| CCL5        | TGTACTCCCGAACCATTTC         | TACACCAGTGGCAAGTGCTC       |
| CCL20       | CGTGTGAAGCCCACAATAAA        | GTGCTGCTACTCCACCTCTG       |
| CCL26       | ATCAGGCCCTTCTCAGGTTT        | AATTGAGGCTGAGCCAAAGA       |
| C1s         | CAAAGGGTTCTCTGGGGACT        | TGGGGAGTATCACTGTGCTG       |
| C1r         | TCCCAGGCTTTTCTTATCA         | GAAGCTCGTCTTCCAGCAGT       |
| CFH         | TCGCTTTTTCTTTAAGGCA         | CCAGATGCATCCGTGTCA         |
| CFB         | GGTTGCTTGTGGTAATCGGT        | TGGAAAACCTGGAAGATGTTT      |
| S100A7      | GCTGACGATGATGAAGGAGAACT     | GTAATTTGTGCCCTTTTGTACA     |
| TLR3        | AGTGCACTTGGTGGTGGAG         | AGGAAAGGCTAGCAGTCATCC      |
| TLR6        | AGCAGAGTGGAGAGGAGCTG        | CCTGCCAGTTAGAGACAGCC       |
| IL-7        | TCATTATTCAGGCAATTGCTACC     | TGAAGGTAAAGATGGCAAACAA     |
| IL-15       | TCCACGATGCCTCCTACAA         | TGTTCCATCATGTTCCATGC       |
| IL-32       | CTG AAG GCC CGA ATG CAC CAG | GCA AAG GTG GTG TCA GTA TC |



**Suppl. table 3****S. Foerster et al: Genes regulated in Th22 cells**

| <b>gene symbol</b> | <b>Th22-specific, up-regulated immuno relevant genes</b>                               | <b>identifier</b> |
|--------------------|----------------------------------------------------------------------------------------|-------------------|
| FGF5               | fibroblast growth factor 5                                                             | 2250              |
| FGF17              | fibroblast growth factor 17                                                            | 8822              |
| FGFR2              | fibroblast growth factor receptor 2                                                    | 2263              |
| THPO               | thrombopoietin                                                                         | 7066              |
| AREG               | amphiregulin                                                                           | 374               |
| BTC                | betacellulin (EGF-R ligand)                                                            | 685               |
| UTS2               | urotensin 2                                                                            | 10911             |
| CCL15              | chemokine (C-C motif) ligand 15                                                        | 6359              |
| CCL7               | chemokine (C-C motif) ligand 7                                                         | 6354              |
| MMP2               | matrix metalloproteinase 2 (gelatinase A, 72kDa gelatinase, 72kDa type IV collagenase) | 4313              |
| MMP13              | matrix metalloproteinase 13 (collagenase 3)                                            | 4322              |
| MMP12              | matrix metalloproteinase 12 (macrophage elastase)                                      | 4321              |
| TLR4               | toll-like receptor 4                                                                   | 7099              |
| PTGER3             | prostaglandin E receptor 3 (subtype EP3)                                               | 5733              |
| PDGFRB             | platelet-derived growth factor receptor, beta polypeptide                              | 5159              |
| TIE1               | tyrosine kinase with immunoglobulin-like and EGF-like domains 1                        | 7075              |

| <b>gene symbol</b> | <b>Th22-specific, up-regulated transcriptional regulators</b> | <b>identifier</b> |
|--------------------|---------------------------------------------------------------|-------------------|
| BNC2               | basonuclin 2                                                  | 54796             |
| FOXO4              | forkhead box O4                                               | 4303              |
| BCL6B              | B-cell CLL/lymphoma 6, member B (zinc finger protein)         | 255877            |
| HOXB8              | homeobox B8                                                   | 3218              |
| POU1F1             | POU class 1 homeobox 1                                        | 5449              |
| NEUROG2            | neurogenin 2                                                  | 63973             |
| SOX13              | SRY (sex determining region Y)-box 13                         | 9580              |
| MED14              | mediator complex subunit 14                                   | 9282              |
| MED18              | mediator complex subunit 18                                   | 54797             |
| HDAC9              | histone deacetylase 9                                         | 9734              |

| <b>gene symbol</b> | <b>Th22-specific, up-regulated enzymes</b>              | <b>identifier</b> |
|--------------------|---------------------------------------------------------|-------------------|
| HSD17B11           | hydroxysteroid (17-beta) dehydrogenase 11               | 51170             |
| PPEF1              | protein phosphatase, EF-hand calcium binding domain 1   | 5475              |
| MEP1B              | mepirin A, beta (metalloendopeptidase, Plasma membrane) | 4225              |
| A4GALT             | alpha 1,4-galactosyltransferase                         | 53947             |
| ICEBERG            | ICEBERG caspase-1 inhibitor                             | 59082             |
| PAH                | phenylalanine hydroxylase                               | 5053              |
| PON2               | paraoxonase 2                                           | 5445              |

### Suppl. table 3

#### S. Foerster et al: Genes regulated in Th22 cells

|         |                                                                                      |       |
|---------|--------------------------------------------------------------------------------------|-------|
| SULT2A1 | sulfotransferase family, cytosolic, 2A, dehydroepiandrosterone -preferring, member 1 | 6822  |
| MYLK    | myosin light chain kinase                                                            | 4638  |
| TIE1    | tyrosine kinase with immunoglobulin-like and EGF-like domains 1                      | 7075  |
| AK5     | adenylate kinase 5                                                                   | 26289 |
| HPGD    | hydroxyprostaglandin dehydrogenase 15-(NAD)                                          | 3248  |
| SULT1B1 | sulfotransferase family, cytosolic, 1B, member 1                                     | 27284 |
| KLK2    | kallikrein-related peptidase 2                                                       | 3817  |
| GARNL4  | GTPase activating Rap/RanGAP domain-like 4                                           | 23108 |
| PRKG1   | protein kinase, cGMP-dependent, type I                                               | 5592  |
| PDE2A   | phosphodiesterase 2A, cGMP-stimulated                                                | 5138  |
| USP2    | ubiquitin specific peptidase 2                                                       | 9099  |
| AMPD1   | adenosine monophosphate deaminase 1 (isoform M)                                      | 270   |

| gene symbol | Th22-specific, up-regulated receptors                                 | identifier |
|-------------|-----------------------------------------------------------------------|------------|
| PPARGC1A    | peroxisome proliferator-activated receptor gamma, coactivator 1 alpha | 10891      |
| SCN9A       | sodium channel, voltage-gated, type IX, alpha subunit                 | 6335       |
| SCN3A       | sodium channel, voltage-gated, type III, alpha subunit                | 6328       |
| GRIA2       | glutamate receptor, ionotropic, AMPA 2                                | 2891       |
| GRIA3       | glutamate receptor, ionotropic, AMPA 3                                | 2892       |
| GRIN2B      | glutamate receptor, ionotropic, N-methyl D-aspartate 2B               | 2904       |
| GRIN2A      | glutamate receptor, ionotropic, N-methyl D-aspartate 2A               | 2903       |
| RAMP1       | receptor (G protein-coupled) activity modifying protein 1             | 10267      |
| CXADR       | coxsackie virus and adenovirus receptor                               | 1525       |
| SORCS1      | sortilin-related VPS10 domain containing receptor 1                   | 114815     |
| VIPR1       | vasoactive intestinal peptide receptor 1                              | 7433       |
| GLRB        | glycine receptor, beta                                                | 2743       |
| SIDT1       | SID1 transmembrane family, member 1                                   | 54847      |

| gene symbol | Th22-specific, up-regulated housekeeping genes                  | identifier |
|-------------|-----------------------------------------------------------------|------------|
| CNTNAP4     | contactin associated protein-like 4                             | 85445      |
| STARD8      | StAR-related lipid transfer (START) domain containing 8         | 9754       |
| SOSTDC1     | sclerostin domain containing 1                                  | 25928      |
| SLC40A1     | solute carrier family 40 (iron-regulated transporter), member 1 | 30061      |
| MAB21L1     | mab-21-like 1 (C. elegans)                                      | 4081       |
| FAM107A     | family with sequence similarity 107, member A                   | 11170      |
| C10orf11    | chromosome 10 open reading frame 11                             | 83938      |
| C15orf49    | chromosome 15 open reading frame 49                             | 63969      |

**Suppl. table 3****S. Foerster et al: Genes regulated in Th22 cells**

|          |                                                                            |        |
|----------|----------------------------------------------------------------------------|--------|
| OPHN1    | oligophrenin 1                                                             | 4983   |
| SLC2A9   | solute carrier family 2 (facilitated glucose transporter), member 9        | 56606  |
| PCDH11Y  | protocadherin 11 Y-linked                                                  | 83259  |
| CLSTN3   | calsyntenin 3                                                              | 9746   |
| DLEC1    | deleted in lung and esophageal cancer 1                                    | 9940   |
| AKAP12   | A kinase (PRKA) anchor protein (gravin) 12                                 | 9590   |
| BEX5     | BEX family member 5                                                        | 340542 |
| PLP1     | proteolipid protein 1                                                      | 5354   |
| SPESP1   | sperm equatorial segment protein 1                                         | 246777 |
| OCRL     | oculocerebrorenal syndrome of Lowe                                         | 4952   |
| TRIM9    | tripartite motif-containing 9                                              | 114088 |
| SAMD3    | sterile alpha motif domain containing 3                                    | 154075 |
| C10orf63 | chromosome 10 open reading frame 63                                        | 219670 |
| CMYA5    | cardiomyopathy associated 5                                                | 202333 |
| SERPINA7 | serpin peptidase inhibitor, clade A member 7                               | 6906   |
| F8       | coagulation factor VIII, procoagulant component                            | 2157   |
| SLC25A29 | solute carrier family 25, member 29                                        | 123096 |
| DMD      | dystrophin                                                                 | 1756   |
| ATP1B4   | ATPase, (Na <sup>+</sup> )/K <sup>+</sup> transporting, beta 4 polypeptide | 23439  |
| COL8A2   | collagen, type VIII, alpha 2                                               | 1296   |
| LAMA1    | laminin, alpha 1                                                           | 284217 |
| LAMB3    | laminin, beta 3                                                            | 3914   |
| GJA1     | gap junction protein, alpha 1, 43kDa                                       | 2697   |
| DNAH11   | dynein, axonemal, heavy chain 11                                           | 8701   |
| TJP1     | tight junction protein 1 (zona occludens 1)                                | 7082   |
| TSPAN2   | tetraspanin 2                                                              | 10100  |
| MYOM2    | myomesin (M-protein) 2, 165kDa                                             | 9172   |

| <b>gene symbol</b> | <b>Th22-specific, down-regulated immuno relevant genes</b>  | <b>identifier</b> |
|--------------------|-------------------------------------------------------------|-------------------|
| SPRY1              | sprouty homolog 1, antagonist of FGF signaling (Drosophila) | 10252             |
| IL12A              | interleukin 12A, p35)                                       | 3592              |
| IL10               | interleukin 10                                              | 3586              |
| IL8RB              | interleukin 8 receptor, beta                                | 3579              |
| CCL20              | chemokine (C-C motif) ligand 20                             | 6364              |
| CCR6               | chemokine (C-C motif) receptor 6                            | 1235              |
| CXCL13             | chemokine (C-X-C motif) ligand 13 (B-cell chemoattractant)  | 10563             |
| MMP19              | matrix metalloproteinase 19                                 | 4327              |
| LAG3               | lymphocyte-activation gene 3                                | 3902              |

**Suppl. table 3****S. Foerster et al: Genes regulated in Th22 cells**

|          |                                                                     |        |
|----------|---------------------------------------------------------------------|--------|
| IL1RL1   | interleukin 1 receptor-like 1                                       | 9173   |
| SCARB1   | scavenger receptor class B, member 1                                | 949    |
| KLRF1    | killer cell lectin-like receptor subfamily F, member 1              | 51348  |
| GPR125   | G protein-coupled receptor 125                                      | 166647 |
| KCNA1    | potassium voltage-gated channel, shaker-related subfamily, member 1 | 3736   |
| KCNE3    | potassium voltage-gated channel, Isk-related family, member 3       | 10008  |
| ACCN2    | amiloride-sensitive cation channel 2, neuronal                      | 41     |
| ADAMTS9  | ADAM metalloproteinase with thrombospondin type 1 motif, 9          | 56999  |
| ADAMTS20 | ADAM metalloproteinase with thrombospondin type 1 motif, 20         | 80070  |

| <b>gene symbol</b> | <b>Th22-specific, down-regulated kinases genes</b>               | <b>identifier</b> |
|--------------------|------------------------------------------------------------------|-------------------|
| CDC42BPA           | CDC42 binding protein kinase alpha (DMPK-like)                   | 8476              |
| CDKL2              | cyclin-dependent kinase-like 2 (CDC2-related kinase)             | 8999              |
| PTPN14             | protein tyrosine phosphatase, non-receptor type 14               | 5784              |
| STYK1              | serine/threonine/tyrosine kinase 1                               | 55359             |
| PLCG2              | phospholipase C, gamma 2 (phosphatidylinositol-specific)         | 5336              |
| LYN                | v-src-1 Yamaguchi sarcoma viral related oncogene homolog         | 4067              |
| CALML4             | calmodulin-like 4                                                | 91860             |
| CAMKV              | CaM kinase-like vesicle-associated                               | 79012             |
| MX1                | myxovirus resistance 1, interferon-inducible protein p78 (mouse) | 4599              |
| IFIT2              | interferon-induced protein with tetratricopeptide repeats 2      | 3433              |

| <b>gene symbol</b> | <b>Th22-specific, down-regulated transcriptional regulators</b>       | <b>identifier</b> |
|--------------------|-----------------------------------------------------------------------|-------------------|
| ZNF93              | zinc finger protein 93                                                | 81931             |
| SALL1              | sal-like 1 (Drosophila)                                               | 6299              |
| NR1D1              | nuclear receptor subfamily 1, group D, member 1                       | 9572              |
| TEAD2              | TEA domain family member 2                                            | 8463              |
| TEAD4              | TEA domain family member 4                                            | 7004              |
| STON1-GTF2A1L      | STON1-GTF2A1L                                                         | 286749            |
| CBFA2T3            | core-binding factor, runt domain, alpha subunit 2; translocated to, 3 | 863               |
| SOX5               | SRY (sex determining region Y)-box 5                                  | 6660              |
| SOX4               | SRY (sex determining region Y)-box 4                                  | 6659              |
| EOMES              | eomesodermin homolog (Xenopus laevis)                                 | 8320              |
| PPARGC1B           | peroxisome proliferator-activated receptor gamma, coactivator 1 beta  | 133522            |
| ZNF215             | zinc finger protein 215                                               | 7762              |
| ZNRF1              | zinc and ring finger 1                                                | 84937             |
| ZNF22              | zinc finger protein 22 (KOX 15)                                       | 7570              |

**Suppl. table 3****S. Foerster et al: Genes regulated in Th22 cells**

|        |                                                              |       |
|--------|--------------------------------------------------------------|-------|
| RNF128 | ring finger protein 128                                      | 79589 |
| ZAK    | sterile alpha motif and leucine zipper containing kinase AZK | 51776 |

| <b>gene symbol</b> | <b>Th22-specific down-regulated transcriptional repressors</b> | <b>identifier</b> |
|--------------------|----------------------------------------------------------------|-------------------|
| NR1D1              | nuclear receptor subfamily 1, group D, member 1                | 9572              |
| ZNF253             | zinc finger protein 253                                        | 56242             |
| SIM2               | single-minded homolog 2 (Drosophila)                           | 6493              |
| TRPS1              | trichorhinophalangeal syndrome I                               | 7227              |

| <b>gene symbol</b> | <b>Th22-specific, down-regulated cellular genes</b>                     | <b>identifier</b> |
|--------------------|-------------------------------------------------------------------------|-------------------|
| LCP1               | lymphocyte cytosolic protein 1 (L-plastin)                              | 3936              |
| GNAT2              | G protein, alpha transducing activity polypeptide 2                     | 2780              |
| RHOBTB3            | Rho-related BTB domain containing 3                                     | 22836             |
| NDN                | necdin homolog (mouse)                                                  | 4692              |
| TNS1               | tensin 1                                                                | 7145              |
| FAM98B             | family with sequence similarity 98, member B                            | 283742            |
| FEZ1               | fasciculation and elongation protein zeta 1 (zygin I)                   | 9638              |
| CALD1              | caldesmon 1                                                             | 800               |
| TPBG               | trophoblast glycoprotein                                                | 7162              |
| STON1              | stonin 1                                                                | 11037             |
| MUC16              | mucin 16, cell surface associated                                       | 94025             |
| EPYC               | epiphycan                                                               | 1833              |
| DDEF2              | development and differentiation enhancing factor 2                      | 8853              |
| RTTN               | rotatin                                                                 | 25914             |
| KIF7               | kinesin family member 7                                                 | 374654            |
| TWSG1              | twisted gastrulation homolog 1 (Drosophila)                             | 57045             |
| SLC4A10            | solute carrier family 4, sodium bicarbonate transporter-like, member 10 | 57282             |
| EYA4               | eyes absent homolog 4 (Drosophila)                                      | 2070              |
| SGOL1              | shugoshin-like 1 (S. pombe)                                             | 151648            |
| PSEN2              | presenilin 2 (Alzheimer disease 4)                                      | 5664              |
| STON2              | stonin 2                                                                | 85439             |
| B3GALNT1           | beta-1,3-N-acetylgalactosaminyltransferase 1                            | 8706              |
| GAL                | galanin prepropeptide                                                   | 51083             |
| PROK2              | prokineticin 2                                                          | 60675             |
| XIRP2              | xin actin-binding repeat containing 2                                   | 129446            |
| SPON2              | spondin 2, extracellular matrix protein                                 | 10417             |
| PODXL2             | podocalyxin-like 2                                                      | 50512             |
| DLGAP1             | discs, large (Drosophila) homolog-associated protein 1                  | 9229              |

**Suppl. table 3****S. Foerster et al: Genes regulated in Th22 cells**

|        |                                                                                      |        |
|--------|--------------------------------------------------------------------------------------|--------|
| PLN    | phospholamban                                                                        | 5350   |
| RAD54B | RAD54 homolog B ( <i>S. cerevisiae</i> )                                             | 25788  |
| MFI2   | antigen p97 (melanoma associated) identified by monoclonal antibodies 133.2 and 96.5 | 4241   |
| RFX6   | regulatory factor X, 6                                                               | 222546 |
| STC2   | stanniocalcin 2                                                                      | 8614   |
| TUBB   | tubulin, beta                                                                        | 203068 |
| CASC5  | cancer susceptibility candidate 5                                                    | 57082  |

| <b>gene symbol</b> | <b>Th22-specific, down-regulated housekeeping enzymes</b>                                      | <b>identifier</b> |
|--------------------|------------------------------------------------------------------------------------------------|-------------------|
| ATAD3B             | ATPase family, AAA domain containing 3B                                                        | 83858             |
| ATP10A             | ATPase, class V, type 10A                                                                      | 57194             |
| ARL6IP2            | ADP-ribosylation factor-like 6 interacting protein 2                                           | 64225             |
| CKMT2              | creatine kinase, mitochondrial 2 (sarcomeric)                                                  | 1160              |
| TOP1MT             | topoisomerase (DNA) I, mitochondrial                                                           | 116447            |
| PHGDH              | phosphoglycerate dehydrogenase                                                                 | 26227             |
| LONRF2             | LON peptidase N-terminal domain and ring finger 2                                              | 164832            |
| GALNT1             | UDP-N-acetyl-alpha-D-galactosamine:polypeptide N-acetylgalactosaminyltransferase 1 (GalNAc-T1) | 2589              |
| PLK4               | polo-like kinase 4 ( <i>Drosophila</i> )                                                       | 10733             |
| COASY              | Coenzyme A synthase                                                                            | 80347             |
| MMEL1              | membrane metallo-endopeptidase-like 1                                                          | 79258             |
| ME1                | malic enzyme 1, NADP(+)-dependent, cytosolic                                                   | 4199              |
| STARD13            | StAR-related lipid transfer (START) domain containing 13                                       | 90627             |
| SOD2               | superoxide dismutase 2, mitochondrial                                                          | 6648              |

## Supplemental Table 4

### S. Foerster et al: Keratinocyte genes regulated by Th22 supernatants

| gene symbol | Th22-supernatant-induced cytokines in keratinocytes | identifier |
|-------------|-----------------------------------------------------|------------|
| IFNK        | interferon, kappa                                   | 56832      |
| IL6         | interleukin 6 (interferon, beta 2)                  | 3569       |
| IL7         | interleukin 7                                       | 3574       |
| IL15        | interleukin 15                                      | 3600       |
| IL24        | interleukin 24                                      | 11009      |
| IL32        | interleukin 32                                      | 9235       |
| FGF5        | fibroblast growth factor 5                          | 2250       |
| BMP1        | bone morphogenetic protein 1                        | 649        |
| GDNF        | glial cell derived neurotrophic factor              | 2668       |
| B2M         | beta-2-microglobulin                                | 567        |
| ANGPTL4     | angiopoietin-like 4                                 | 51129      |

| gene symbol | Th22-supernatant-induced chemokines in keratinocytes | identifier |
|-------------|------------------------------------------------------|------------|
| CCL5        | chemokine (C-C motif) ligand 5                       | 6352       |
| CCL7        | chemokine (C-C motif) ligand 7                       | 6354       |
| CCL2        | chemokine (C-C motif) ligand 2                       | 6347       |
| CXCL10      | chemokine (C-X-C motif) ligand 10                    | 3627       |
| CCL26       | chemokine (C-C motif) ligand 26                      | 10344      |
| CX3CL1      | chemokine (C-X3-C motif) ligand 1                    | 6376       |
| CXCL11      | chemokine (C-X-C motif) ligand 11                    | 6373       |
| CCL20       | chemokine (C-C motif) ligand 20                      | 6364       |
| CXCL9       | chemokine (C-X-C motif) ligand 9                     | 4283       |

| gene symbol | Th22-supernatant-induced innate defense genes in keratinocytes | identifier |
|-------------|----------------------------------------------------------------|------------|
| MUC1        | mucin 1, cell surface associated                               | 4582       |
| MUC16       | mucin 16, cell surface associated                              | 94025      |
| DEFB103A    | defensin, beta 103A                                            | 55894      |
| CFH         | complement factor H                                            | 3075       |
| CFHR3       | complement factor H-related 3                                  | 10878      |
| C1S         | complement component 1, s subcomponent                         | 716        |
| C1R         | complement component 1, r subcomponent                         | 715        |
| CFB         | complement factor B                                            | 629        |
| C1QTNF1     | C1q and tumor necrosis factor related protein 1                | 114897     |
| C1RL        | complement component 1, r subcomponent-like                    | 51279      |

## Supplemental Table 4

### S. Foerster et al: Keratinocyte genes regulated by Th22 supernatants

| gene symbol | Th22-supernatant-induced structural genes in keratinocytes         | identifier |
|-------------|--------------------------------------------------------------------|------------|
| COL8A1      | collagen, type VIII, alpha 1                                       | 1295       |
| COL5A1      | collagen, type V, alpha 1                                          | 1289       |
| COL1A2      | collagen, type I, alpha 2                                          | 1278       |
| LMNB1       | lamin B1                                                           | 4001       |
| KRT6A       | keratin 6A                                                         | 3853       |
| KRT8        | keratin 8                                                          | 3856       |
| KRT18       | keratin 18                                                         | 3875       |
| KAL1        | Kallmann syndrome 1 sequence                                       | 3730       |
| NELL1       | NEL-like 1 (chicken)                                               | 4745       |
| CTNNB1      | catenin (cadherin-associated protein), beta 1, 88kDa               | 1499       |
| MRPS11      | mitochondrial ribosomal protein S11                                | 64963      |
| CLDN4       | claudin 4                                                          | 1364       |
| WNT6        | wingless-type MMTV integration site family, member 6               | 7475       |
| ACTA2       | actin, alpha 2, smooth muscle, aorta                               | 59         |
| MMP2        | matrix metalloproteinase 2 (gelatinase A, 72kDa gelatinase, 72kDa) | 4313       |
| MMP14       | matrix metalloproteinase 14 (membrane-inserted)                    | 4323       |
| MMP28       | matrix metalloproteinase 28                                        | 79148      |

| gene symbol | Th22-supernatant-induced transcription factors in keratinocytes         | identifier |
|-------------|-------------------------------------------------------------------------|------------|
| FOXC2       | forkhead box C2 (MFX-1, mesenchyme forkhead 1)                          | 2303       |
| STAT1       | signal transducer and activator of transcription 1, 91kDa               | 6772       |
| TBX3        | T-box 3                                                                 | 6926       |
| TBX21       | T-box 21                                                                | 30009      |
| NFATC1      | nuclear factor of activated T-cells, cytoplasmic, calcineurin-dependent | 4772       |
| IRF1        | interferon regulatory factor 1                                          | 3659       |
| IRF3        | interferon regulatory factor 3                                          | 3661       |
| IRF7        | interferon regulatory factor 7                                          | 3665       |
| IRF9        | interferon regulatory factor 9                                          | 10379      |
| IKZF4       | IKAROS family zinc finger 4 (Eos)                                       | 64375      |
| SP140       | SP140 nuclear body protein                                              | 11262      |
| NFIX        | nuclear factor I/X (CCAAT-binding transcription factor)                 | 4784       |
| NFIC        | nuclear factor I/C (CCAAT-binding transcription factor)                 | 4782       |
| NEUROG3     | neurogenin 3                                                            | 50674      |



## Supplemental Table 4

### S. Foerster et al: Keratinocyte genes regulated by Th22 supernatants

|         |                                                                  |        |
|---------|------------------------------------------------------------------|--------|
| HMGA1   | high mobility group AT-hook 1                                    | 3159   |
| NFE2L1  | nuclear factor (erythroid-derived 2)-like 1                      | 4779   |
| SCML2   | sex comb on midleg-like 2 (Drosophila)                           | 10389  |
| NEUROD2 | neurogenic differentiation 2                                     | 4761   |
| ETV7    | ets variant gene 7 (TEL2 oncogene)                               | 51513  |
| ETV6    | ets variant gene 6 (TEL oncogene)                                | 2120   |
| ATF3    | activating transcription factor 3                                | 467    |
| POU5F1  | POU class 5 homeobox 1                                           | 5460   |
| POU3F3  | POU class 3 homeobox 3                                           | 5455   |
| TP73    | tumor protein p73                                                | 7161   |
| SOX1    | SRY (sex determining region Y)-box 1                             | 6656   |
| SMARCA4 | SWI/SNF related, matrix associated, actin dependent regulator of | 6597   |
| MSX1    | msh homeobox 1                                                   | 4487   |
| NKX2-8  | NK2 homeobox 8                                                   | 26257  |
| LBX1    | ladybird homeobox 1                                              | 10660  |
| TRIM22  | tripartite motif-containing 22                                   | 10346  |
| ZSCAN4  | zinc finger and SCAN domain containing 4                         | 201516 |
| ZFYVE9  | zinc finger, FYVE domain containing 9                            | 9372   |
| TLX2    | T-cell leukemia homeobox 2                                       | 3196   |
| NR5A1   | nuclear receptor subfamily 5, group A, member 1                  | 2516   |
| USF1    | upstream transcription factor 1                                  | 7391   |
| AFF4    | AF4/FMR2 family, member 4                                        | 27125  |
| HOXA10  | homeobox A10                                                     | 3206   |
| ERG     | v-ets erythroblastosis virus E26 oncogene homolog (avian)        | 2078   |

| gene symbol | Th22-supernatant-induced transcriptional regulators in ker.         | identifier |
|-------------|---------------------------------------------------------------------|------------|
| SOCS3       | suppressor of cytokine signaling 3                                  | 9021       |
| TAF8        | TAF8 RNA polymerase II, TATA box binding protein (TBP)-associa      | 129685     |
| CXXC1       | CXXC finger 1 (PHD domain)                                          | 30827      |
| SEC14L2     | SEC14-like 2 (S. cerevisiae)                                        | 23541      |
| MED13       | mediator complex subunit 13                                         | 9969       |
| NFATC1      | nuclear factor of activated T-cells, cytoplasmic, calcineurin-deper | 4772       |
| CTNNB1      | catenin (cadherin-associated protein), beta 1, 88kDa                | 1499       |
| CRTC1       | CREB regulated transcription coactivator 1                          | 23373      |
| SMARCA4     | SWI/SNF related, matrix associated, actin dependent regulator of    | 6597       |
| FOXC2       | forkhead box C2 (MFH-1, mesenchyme forkhead 1)                      | 2303       |
| NR5A1       | nuclear receptor subfamily 5, group A, member 1                     | 2516       |
| CIITA       | class II, major histocompatibility complex, transactivator          | 4261       |

## Supplemental Table 4

### S. Foerster et al: Keratinocyte genes regulated by Th22 supernatants

|       |                               |      |
|-------|-------------------------------|------|
| HMGA1 | high mobility group AT-hook 1 | 3159 |
|-------|-------------------------------|------|

  

| gene symbol | Th22-supernatant-induced receptors in keratinocytes                        | identifier |
|-------------|----------------------------------------------------------------------------|------------|
| FGFR3       | fibroblast growth factor receptor 3                                        | 2261       |
| FGFR1       | fibroblast growth factor receptor 1                                        | 2260       |
| IFNAR2      | interferon (alpha, beta and omega) receptor 2                              | 3455       |
| IL3RA       | interleukin 3 receptor, alpha (low affinity)                               | 3563       |
| IL7R        | interleukin 7 receptor                                                     | 3575       |
| IL12RB2     | interleukin 12 receptor, beta 2                                            | 3595       |
| IL15RA      | interleukin 15 receptor, alpha                                             | 3601       |
| IL17RA      | interleukin 17 receptor A                                                  | 23765      |
| IL17RC      | interleukin 17 receptor C                                                  | 84818      |
| CXCR3       | chemokine (C-X-C motif) receptor 3                                         | 2833       |
| CX3CR1      | chemokine (C-X3-C motif) receptor 1                                        | 1524       |
| CMKLR1      | chemokine-like receptor 1                                                  | 1240       |
| PTAFR       | platelet-activating factor receptor                                        | 5724       |
| TNFRSF14    | tumor necrosis factor receptor superfamily, member 14 (herpesvir           | 8764       |
| TLR3        | toll-like receptor 3                                                       | 7098       |
| CD86        | CD86 molecule                                                              | 942        |
| CD40        | CD40 molecule, TNF receptor superfamily member 5                           | 958        |
| ICAM1       | intercellular adhesion molecule 1                                          | 3383       |
| CD274       | CD274 molecule (PD-L1)                                                     | 29126      |
| CD49B       | ITGA2 integrin, alpha 2 (CD49B, alpha 2 subunit of VLA-2 receptor)         | 3673       |
| EPHA2       | EPH receptor A2                                                            | 1969       |
| LRP4        | low density lipoprotein receptor-related protein 4                         | 4038       |
| LRP3        | low density lipoprotein receptor-related protein 3                         | 4037       |
| LRP1        | low density lipoprotein-related protein 1 (alpha-2-macroglobulin receptor) | 4035       |
| LY75        | lymphocyte antigen 75                                                      | 4065       |
| CLEC1B      | C-type lectin domain family 1, member B                                    | 51266      |
| SEMA4C      | sema domain, immunoglobulin domain (Ig), transmembrane domain              | 54910      |
| SCARF2      | scavenger receptor class F, member 2                                       | 91179      |
| SEMA3D      | sema domain, immunoglobulin domain (Ig), short basic domain, s             | 223117     |
| PTPRN       | protein tyrosine phosphatase, receptor type, N                             | 5798       |
| TMPRSS4     | transmembrane protease, serine 4                                           | 56649      |
| GPR78       | G protein-coupled receptor 78                                              | 27201      |
| GPR109B     | G protein-coupled receptor 109B                                            | 8843       |
| LGR4        | leucine-rich repeat-containing G protein-coupled receptor 4                | 55366      |
| CHRNA2      | cholinergic receptor, nicotinic, alpha 2 (neuronal)                        | 1135       |

## Supplemental Table 4

### S. Foerster et al: Keratinocyte genes regulated by Th22 supernatants

|          |                                                              |        |
|----------|--------------------------------------------------------------|--------|
| AKAP13   | A kinase (PRKA) anchor protein 13                            | 11214  |
| PDCD1LG2 | programmed cell death 1 ligand 2                             | 80380  |
| PVRL2    | poliovirus receptor-related 2 (herpesvirus entry mediator B) | 5819   |
| C5orf39  | chromosome 5 open reading frame 39                           | 389289 |
| PVR      | poliovirus receptor                                          | 5817   |
| MED13    | mediator complex subunit 13                                  | 9969   |
| PLXNB1   | plexin B1                                                    | 5364   |
| EDNRA    | endothelin receptor type A                                   | 1909   |
| OPRK1    | opioid receptor, kappa 1                                     | 4986   |
| NPVF     | neuropeptide VF precursor                                    | 64111  |
| GFRA4    | GDNF family receptor alpha 4                                 | 64096  |
| NPBWR1   | neuropeptides B/W receptor 1                                 | 2831   |
| HLA-G    | major histocompatibility complex, class I, G                 | 3135   |
| HLA-F    | major histocompatibility complex, class I, F                 | 3134   |
| HLA-E    | major histocompatibility complex, class I, E                 | 3133   |
| HLA-B    | major histocompatibility complex, class I, B                 | 3106   |
| HLA-DRB3 | major histocompatibility complex, class II, DR beta 3        | 3125   |
| HLA-DRA  | major histocompatibility complex, class II, DR alpha         | 3122   |
| HLA-DPA1 | major histocompatibility complex, class II, DP alpha 1       | 3113   |
| HLA-C    | major histocompatibility complex, class I, C                 | 3107   |
| HLA-A    | major histocompatibility complex, class I, A                 | 3105   |

| gene symbol | Th22-supernatant-induced catalytic genes in keratinocytes | identifier |
|-------------|-----------------------------------------------------------|------------|
| INDO        | indoleamine-pyrrole 2,3 dioxygenase                       | 3620       |
| JAK1        | Janus kinase 1 (a protein tyrosine kinase)                | 3716       |
| PRKD2       | protein kinase D2                                         | 25865      |
| PKN3        | protein kinase N3                                         | 29941      |
| PRKCZ       | protein kinase C, zeta                                    | 5590       |
| SMG1        | PI-3-kinase-related kinase SMG-1                          | 23049      |
| HDAC10      | histone deacetylase 10                                    | 83933      |
| MAP4K2      | mitogen-activated protein kinase kinase kinase 2          | 5871       |
| MAP2K3      | mitogen-activated protein kinase kinase 3                 | 5606       |
| MAP4K5      | mitogen-activated protein kinase kinase kinase 5          | 11183      |
| MAP3K14     | mitogen-activated protein kinase kinase kinase 14         | 9020       |
| ADAR        | adenosine deaminase, RNA-specific                         | 103        |
| ADAMTSL4    | ADAMTS-like 4                                             | 54507      |
| SAMHD1      | SAM domain and HD domain 1                                | 25939      |
| PFKL        | phosphofructokinase, liver                                | 5211       |

**Supplemental Table 4****S. Foerster et al: Keratinocyte genes regulated by Th22 supernatants**

|         |                                                                               |        |
|---------|-------------------------------------------------------------------------------|--------|
| PRPF19  | PRP19/PSO4 pre-mRNA processing factor 19 homolog                              | 27339  |
| CEL     | carboxyl ester lipase (bile salt-stimulated lipase)                           | 1056   |
| GBP1    | guanylate binding protein 1, interferon-inducible, 67kDa                      | 2633   |
| GBP5    | guanylate binding protein 5                                                   | 115362 |
| GNB2    | guanine nucleotide binding protein (G protein), beta polypeptide 2            | 2783   |
| GNAO1   | G protein, alpha activating activity polypeptide O                            | 2775   |
| GBP2    | guanylate binding protein 2, interferon-inducible                             | 2634   |
| IFI30   | interferon, gamma-inducible protein 30                                        | 10437  |
| RFWD2   | ring finger and WD repeat domain 2                                            | 64326  |
| UBE2L6  | ubiquitin-conjugating enzyme E2L 6                                            | 9246   |
| GCNT3   | glucosaminyl (N-acetyl) transferase 3, mucin type                             | 9245   |
| DUOX1   | dual oxidase 1                                                                | 53905  |
| FADS3   | fatty acid desaturase 3                                                       | 3995   |
| CBR3    | carbonyl reductase 3                                                          | 874    |
| GSTM4   | glutathione S-transferase M4                                                  | 2948   |
| MAN1B1  | mannosidase, alpha, class 1B, member 1                                        | 11253  |
| RSAD2   | radical S-adenosyl methionine domain containing 2                             | 91543  |
| TYMP    | thymidine phosphorylase                                                       | 1890   |
| ERAP1   | endoplasmic reticulum aminopeptidase 1                                        | 51752  |
| CASP1   | caspase 1, apoptosis-rel.cysteine peptidase (interleukin 1, beta, convertase) | 834    |
| CAPN3   | calpain 3, (p94)                                                              | 825    |
| AKAP13  | A kinase (PRKA) anchor protein 13                                             | 11214  |
| SEPX1   | selenoprotein X, 1                                                            | 51734  |
| SPPL2B  | signal peptide peptidase-like 2B                                              | 56928  |
| PIB5PA  | phosphatidylinositol (4,5) bisphosphate 5-phosphatase, A                      | 27124  |
| PIK3AP1 | phosphoinositide-3-kinase adaptor protein 1                                   | 118788 |
| PARP12  | poly (ADP-ribose) polymerase family, member 12                                | 64761  |
| ERAP2   | endoplasmic reticulum aminopeptidase 2                                        | 64167  |
| OAS3    | 2'-5'-oligoadenylate synthetase 3, 100kDa                                     | 4940   |
| OAS2    | 2'-5'-oligoadenylate synthetase 2, 69/71kDa                                   | 4939   |
| OAS1    | 2',5'-oligoadenylate synthetase 1, 40/46kDa                                   | 4938   |
| FN3K    | fructosamine 3 kinase                                                         | 64122  |
| DDX58   | DEAD (Asp-Glu-Ala-Asp) box polypeptide 58                                     | 23586  |
| STEAP4  | STEAP family member 4                                                         | 79689  |
| PANK2   | pantothenate kinase 2                                                         | 80025  |
| PTPRN   | protein tyrosine phosphatase, receptor type, N                                | 5798   |
| PTEN    | phosphatase and tensin homolog                                                | 5728   |
| DLST    | dihydrolipoamide S-succinyltransferase                                        | 1743   |

**Supplemental Table 4****S. Foerster et al: Keratinocyte genes regulated by Th22 supernatants**

|         |                                                                                                   |        |
|---------|---------------------------------------------------------------------------------------------------|--------|
| SBF1    | SET binding factor 1                                                                              | 6305   |
| HSD3B2  | hydroxy-delta-5-steroid dehydrogenase, 3 beta- and steroid delta-isomerase 2                      | 3284   |
| NNMT    | nicotinamide N-methyltransferase                                                                  | 4837   |
| TAPBP   | TAP binding protein (tapasin)                                                                     | 6892   |
| CFB     | complement factor B                                                                               | 629    |
| SYN1    | synapsin I                                                                                        | 6853   |
| LINCR   | likely ortholog of mouse lung-inducible Neutralized-related C3HC4 RING domain protein             | 93082  |
| PARP14  | poly (ADP-ribose) polymerase family, member 14                                                    | 54625  |
| NELL1   | NEL-like 1 (chicken)                                                                              | 4745   |
| CTRL    | chymotrypsin-like                                                                                 | 1506   |
| CYP27B1 | cytochrome P450, family 27, subfamily B, polypeptide 1                                            | 1594   |
| PARP9   | poly (ADP-ribose) polymerase family, member 9                                                     | 83666  |
| TMPRSS4 | transmembrane protease, serine 4                                                                  | 56649  |
| LOXL3   | lysyl oxidase-like 3                                                                              | 84695  |
| CHD8    | chromodomain helicase DNA binding protein 8                                                       | 57680  |
| PPM2C   | protein phosphatase 2C, magnesium-dependent, catalytic subunit                                    | 54704  |
| PSMB9   | proteasome (prosome, macropain) subunit, beta type, 9                                             | 5698   |
| TENC1   | tensin like C1 domain containing phosphatase (tensin 2)                                           | 23371  |
| PSMB10  | proteasome (prosome, macropain) subunit, beta type, 10                                            | 5699   |
| PSMB8   | proteasome (prosome, macropain) subunit, beta type, 8                                             | 5696   |
| MYO9B   | myosin IXB                                                                                        | 4650   |
| SGPP2   | sphingosine-1-phosphate phosphatase 2                                                             | 130367 |
| ADC     | arginine decarboxylase                                                                            | 113451 |
| CSAD    | cysteine sulfinic acid decarboxylase                                                              | 51380  |
| EHMT2   | euchromatic histone-lysine N-methyltransferase 2                                                  | 10919  |
| HM13    | histocompatibility (minor) 13                                                                     | 81502  |
| NAV2    | neuron navigator 2                                                                                | 89797  |
| XRN1    | 5'-3' exoribonuclease 1                                                                           | 54464  |
| DHX38   | DEAH (Asp-Glu-Ala-His) box polypeptide 38                                                         | 9785   |
| ART3    | ADP-ribosyltransferase 3                                                                          | 419    |
| SOD2    | superoxide dismutase 2, mitochondrial                                                             | 6648   |
| MAN2B1  | mannosidase, alpha, class 2B, member 1                                                            | 4125   |
| MAN2C1  | mannosidase, alpha, class 2C, member 1                                                            | 4123   |
| SSH1    | slingshot homolog 1 (Drosophila)                                                                  | 54434  |
| PRKDC   | protein kinase, DNA-activated, catalytic polypeptide                                              | 5591   |
| C1RL    | complement component 1, r subcomponent-like                                                       | 51279  |
| SMARCA4 | SWI/SNF related, matrix associated, actin dependent regulator of chromatin, subfamily a, member 4 | 6597   |
| GLRX    | glutaredoxin (thioltransferase)                                                                   | 2745   |

## Supplemental Table 4

### S. Foerster et al: Keratinocyte genes regulated by Th22 supernatants

|          |                                                                               |        |
|----------|-------------------------------------------------------------------------------|--------|
| NT5C3    | 5'-nucleotidase, cytosolic III                                                | 51251  |
| CPT1B    | carnitine palmitoyltransferase 1B (muscle)                                    | 1375   |
| CPM      | carboxypeptidase M                                                            | 1368   |
| OASL     | 2'-5'-oligoadenylate synthetase-like                                          | 8638   |
| ARSI     | arylsulfatase family, member I                                                | 340075 |
| CP       | ceruloplasmin (ferroxidase)                                                   | 1356   |
| REXO1    | REX1, RNA exonuclease 1 homolog (S. cerevisiae)                               | 57455  |
| APOBEC3D | apolipoprotein B mRNA editing enzyme, catalytic polypeptide-like 3D           | 140564 |
| MMEL1    | membrane metallo-endopeptidase-like 1                                         | 79258  |
| IKBKE    | inhibitor of kappa light polypeptide gene enhancer in B-cells, kinase epsilon | 9641   |
| HERC5    | hect domain and RLD 5                                                         | 51191  |
| CARD11   | caspase recruitment domain family, member 11                                  | 84433  |
| CDK10    | cyclin-dependent kinase 10                                                    | 8558   |
| BCR      | breakpoint cluster region                                                     | 613    |
| APOBEC3G | apolipoprotein B mRNA editing enzyme, catalytic polypeptide-like 3G           | 60489  |
| AKT2     | v-akt murine thymoma viral oncogene homolog 2                                 | 208    |
| SETX     | senataxin                                                                     | 23064  |
| MOV10    | Mov10, Moloney leukemia virus 10, homolog (mouse)                             | 4343   |
| WARS     | tryptophanyl-tRNA synthetase                                                  | 7453   |
| CYCS     | cytochrome c, somatic                                                         | 54205  |
| HSD3B1   | hydroxy-delta-5-steroid dehydrogenase, 3 beta- and steroid delta-isomerase 1  | 3283   |
| AEBP1    | AE binding protein 1                                                          | 165    |
| CDC42BPA | CDC42 binding protein kinase alpha (DMPK-like)                                | 8476   |
| PLOD2    | procollagen-lysine, 2-oxoglutarate 5-dioxygenase 2                            | 5352   |
| NARG1    | NMDA receptor regulated 1                                                     | 80155  |
| SPG3A    | spastic paraplegia 3A (autosomal dominant)                                    | 51062  |
| EXOC4    | exocyst complex component 4                                                   | 60412  |
| DDX17    | DEAD (Asp-Glu-Ala-Asp) box polypeptide 17                                     | 10521  |
| CKB      | creatine kinase, brain                                                        | 1152   |
| UNQ1887  | signal peptide peptidase 3                                                    | 121665 |
| ZC3HAV1  | zinc finger CCCH-type, antiviral 1                                            | 56829  |
| TRAF7    | TNF receptor-associated factor 7                                              | 84231  |
| EPHX1    | epoxide hydrolase 1, microsomal (xenobiotic)                                  | 2052   |
| ACE2     | angiotensin I converting enzyme (peptidyl-dipeptidase A) 2                    | 59272  |
| UBE2B    | ubiquitin-conjugating enzyme E2B (RAD6 homolog)                               | 7320   |
| UBA7     | ubiquitin-like modifier activating enzyme 7                                   | 7318   |
| ADAMTSL3 | ADAMTS-like 3                                                                 | 57188  |
| IFIH1    | interferon induced with helicase C domain 1                                   | 64135  |

## Supplemental Table 4

### S. Foerster et al: Keratinocyte genes regulated by Th22 supernatants

|        |                                                       |       |
|--------|-------------------------------------------------------|-------|
| ITPKC  | inositol 1,4,5-trisphosphate 3-kinase C               | 80271 |
| CTSB   | cathepsin B                                           | 1508  |
| GGT3P  | gamma-glutamyltransferase 3 pseudogene                | 2679  |
| CYP4F2 | cytochrome P450, family 4, subfamily F, polypeptide 2 | 8529  |
| HUWE1  | HECT, UBA and WWE domain containing 1                 | 10075 |
| NAT1   | N-acetyltransferase 1 (arylamine N-acetyltransferase) | 9     |
| RRAD   | Ras-related associated with diabetes                  | 6236  |

## Supplemental Table 4

### S. Foerster et al: Keratinocyte genes regulated by Th22 supernatants

| gene symbol | Th22-supernatant-inhibited structural genes in keratinocytes | identifier |
|-------------|--------------------------------------------------------------|------------|
| TPM1        | tropomyosin 1 (alpha)                                        | 7168       |
| EPB41L4B    | erythrocyte membrane protein band 4.1 like 4B                | 54566      |
| COPA        | coatomer protein complex, subunit alpha                      | 1314       |
| CDC42SE2    | CDC42 small effector 2                                       | 56990      |
| CLDN12      | claudin 12                                                   | 9069       |
| CLDN17      | claudin 17                                                   | 26285      |
| NEFL        | neurofilament, light polypeptide 68kDa                       | 4747       |
| ACTG2       | actin, gamma 2, smooth muscle, enteric                       | 72         |
| ACTA1       | actin, alpha 1, skeletal muscle                              | 58         |
| CTNNA3      | catenin (cadherin-associated protein), alpha 3               | 29119      |
| WNT4        | wingless-type MMTV integration site family, member 4         | 54361      |
| NPHP4       | nephronophthisis 4                                           | 261734     |

| gene symbol | Th22-supernatant-inhibited transcription factors in ker.                          | identifier |
|-------------|-----------------------------------------------------------------------------------|------------|
| FOXO4       | forkhead box O4                                                                   | 4303       |
| ZNF140      | zinc finger protein 140                                                           | 7699       |
| ZNF367      | zinc finger protein 367                                                           | 195828     |
| RORA        | RAR-related orphan receptor A                                                     | 6095       |
| ROR1        | receptor tyrosine kinase-like orphan receptor 1                                   | 4919       |
| TGIF2       | TGFB-induced factor homeobox 2                                                    | 60436      |
| CREB5       | cAMP responsive element binding protein 5                                         | 9586       |
| BLZF1       | basic leucine zipper nuclear factor 1                                             | 8548       |
| ATF6        | activating transcription factor 6                                                 | 22926      |
| BARX2       | BARX homeobox 2                                                                   | 8538       |
| EGR2        | early growth response 2 (Krox-20 homolog, Drosophila)                             | 1959       |
| TRPS1       | trichorhinophalangeal syndrome I                                                  | 7227       |
| TCF7L2      | transcription factor 7-like 2 (T-cell specific, HMG-box)                          | 6934       |
| HEY1        | hairy/enhancer-of-split related with YRPW motif 1                                 | 23462      |
| HOXD10      | homeobox D10                                                                      | 3236       |
| KLF2        | Kruppel-like factor 2 (lung)                                                      | 10365      |
| KLF12       | Kruppel-like factor 12                                                            | 11278      |
| TFDP1       | transcription factor Dp-1                                                         | 7027       |
| SRF         | serum response factor (c-fos serum response element-binding transcription factor) | 6722       |
| TFDP3       | transcription factor Dp family, member 3                                          | 51270      |
| SOX4        | SRY (sex determining region Y)-box 4                                              | 6659       |
| CBFA2T3     | core-binding factor, runt domain, alpha subunit 2; translocated to, 3             | 863        |



## Supplemental Table 4

### S. Foerster et al: Keratinocyte genes regulated by Th22 supernatants

| gene symbol | Th22-specific, inhibited receptors                                 | identifier |
|-------------|--------------------------------------------------------------------|------------|
| IL20RA      | interleukin 20 receptor, alpha                                     | 53832      |
| FGFR1       | fibroblast growth factor receptor 1                                | 2260       |
| IL13RA1     | interleukin 13 receptor, alpha 1                                   | 3597       |
| BMPRI1A     | bone morphogenetic protein receptor, type IA                       | 657        |
| ITGBL1      | integrin, beta-like 1 (with EGF-like repeat domains)               | 9358       |
| PTGER4      | prostaglandin E receptor 4 (subtype EP4)                           | 5734       |
| GPR1        | G protein-coupled receptor 1                                       | 2825       |
| GPR110      | G protein-coupled receptor 110                                     | 266977     |
| FZD5        | frizzled homolog 5 (Drosophila)                                    | 7855       |
| TEK         | TEK tyrosine kinase, endothelial                                   | 7010       |
| PAQR8       | progesterone and adipoQ receptor family member VIII                | 85315      |
| SCUBE1      | signal peptide, CUB domain, EGF-like 1                             | 80274      |
| LMBR1       | limb region 1 homolog (mouse)                                      | 64327      |
| HMMR        | hyaluronan-mediated motility receptor (RHAMM)                      | 3161       |
| SLC20A1     | solute carrier family 20 (phosphate transporter), member 1         | 6574       |
| TRPM3       | transient receptor potential cation channel, subfamily M, member 3 | 80036      |
| APLNR       | apelin receptor                                                    | 187        |
| TAPT1       | transmembrane anterior posterior transformation 1                  | 202018     |
| PAQR3       | progesterone and adipoQ receptor family member III                 | 152559     |
| GLRB        | glycine receptor, beta                                             | 2743       |

| gene symbol | Th22-supernatant-inhibited catalytic genes in Keratinocytes  | identifier |
|-------------|--------------------------------------------------------------|------------|
| PTGES3      | prostaglandin E synthase 3 (cytosolic)                       | 10728      |
| PTGR2       | prostaglandin reductase 2                                    | 145482     |
| HSD17B12    | hydroxysteroid (17-beta) dehydrogenase 12                    | 51144      |
| HPGD        | hydroxyprostaglandin dehydrogenase 15-(NAD)                  | 3248       |
| PDE1A       | phosphodiesterase 1A, calmodulin-dependent                   | 5136       |
| PPP1CB      | protein phosphatase 1, catalytic subunit, beta isoform       | 5500       |
| PPP2R5C     | protein phosphatase 2, regulatory subunit B', gamma isoform  | 5527       |
| PPP2CB      | protein phosphatase 2 (formerly 2A), catalytic subunit, beta | 5516       |
| PSPH        | phosphoserine phosphatase                                    | 5723       |
| PLA2G7      | phospholipase A2, group VII (platelet-activating factor      | 7941       |
| PACSIN1     | protein kinase C and casein kinase substrate in neurons 1    | 29993      |

**Supplemental Table 4****S. Foerster et al: Keratinocyte genes regulated by Th22 supernatants**

|         |                                                                                             |        |
|---------|---------------------------------------------------------------------------------------------|--------|
| PRKCSH  | protein kinase C substrate 80K-H                                                            | 5589   |
| PRKCH   | protein kinase C, eta                                                                       | 5583   |
| TTK     | TTK protein kinase                                                                          | 7272   |
| MAPK6   | mitogen-activated protein kinase 6                                                          | 5597   |
| MAPK9   | mitogen-activated protein kinase 9                                                          | 5601   |
| MAP2K5  | mitogen-activated protein kinase kinase 5                                                   | 5607   |
| PLK1    | polo-like kinase 1 (Drosophila)                                                             | 5347   |
| PKIB    | protein kinase (cAMP-dependent, catalytic) inhibitor beta                                   | 5570   |
| GNAZ    | guanine nucleotide binding protein (G protein), alpha z polypeptide                         | 2781   |
| GNAQ    | guanine nucleotide binding protein (G protein), q polypeptide                               | 2776   |
| RND2    | Rho family GTPase 2                                                                         | 8153   |
| RAB4A   | RAB4A, member RAS oncogene family                                                           | 5867   |
| RAB28   | RAB28, member RAS oncogene family                                                           | 9364   |
| RAB38   | RAB38, member RAS oncogene family                                                           | 23682  |
| RHOT1   | ras homolog gene family, member T1                                                          | 55288  |
| RAP1A   | RAP1A, member of RAS oncogene family                                                        | 5906   |
| RAB1A   | RAB1A, member RAS oncogene family                                                           | 5861   |
| ARL6IP2 | ADP-ribosylation factor-like 6 interacting protein 2                                        | 64225  |
| ATP5G3  | ATP synthase, H <sup>+</sup> transporting, mitochondrial F0 complex, subunit C3 (subunit 9) | 518    |
| ATP11B  | ATPase, class VI, type 11B                                                                  | 23200  |
| ATP1B1  | ATPase, Na <sup>+</sup> /K <sup>+</sup> transporting, beta 1 polypeptide                    | 481    |
| ABCB10  | ATP-binding cassette, sub-family B (MDR/TAP), member 10                                     | 23456  |
| UGCGL2  | UDP-glucose ceramide glucosyltransferase-like 2                                             | 55757  |
| UGT1A6  | UDP glucuronosyltransferase 1 family, polypeptide A6                                        | 54578  |
| DNMT3B  | DNA (cytosine-5-)-methyltransferase 3 beta                                                  | 1789   |
| ITPK1   | inositol 1,3,4-triphosphate 5/6 kinase                                                      | 3705   |
| PIGA    | phosphatidylinositol glycan anchor biosynthesis, class A                                    | 5277   |
| PIP5K1A | phosphatidylinositol-4-phosphate 5-kinase, type I, alpha                                    | 8394   |
| PIGU    | phosphatidylinositol glycan anchor biosynthesis, class U                                    | 128869 |
| TEK     | TEK tyrosine kinase, endothelial                                                            | 7010   |
| NEK1    | NIMA (never in mitosis gene a)-related kinase 1                                             | 4750   |
| NEK2    | NIMA (never in mitosis gene a)-related kinase 2                                             | 4751   |
| NEK4    | NIMA (never in mitosis gene a)-related kinase 4                                             | 6787   |
| NEK7    | NIMA (never in mitosis gene a)-related kinase 7                                             | 140609 |
| SNF1LK  | SNF1-like kinase                                                                            | 150094 |
| WNK1    | WNK lysine deficient protein kinase 1                                                       | 65125  |
| MYLK    | myosin light chain kinase                                                                   | 4638   |
| ACOX2   | acyl-Coenzyme A oxidase 2, branched chain                                                   | 8309   |

## Supplemental Table 4

### S. Foerster et al: Keratinocyte genes regulated by Th22 supernatants

|         |                                                                           |        |
|---------|---------------------------------------------------------------------------|--------|
| HMGCS1  | 3-hydroxy-3-methylglutaryl-Coenzyme A synthase 1 (soluble)                | 3157   |
| ACADSB  | acyl-Coenzyme A dehydrogenase, short/branched chain                       | 36     |
| ASAH1   | N-acylsphingosine amidohydrolase (acid ceramidase) 1                      | 427    |
| SOAT1   | sterol O-acyltransferase (acyl-Coenzyme A: cholesterol acyltransferase) 1 | 6646   |
| ACOT12  | acyl-CoA thioesterase 12                                                  | 134526 |
| SCD5    | stearoyl-CoA desaturase 5                                                 | 79966  |
| NLN     | neurolysin (metallopeptidase M3 family)                                   | 57486  |
| AGPAT9  | 1-acylglycerol-3-phosphate O-acyltransferase 9                            | 84803  |
| ARIH1   | ariadne homolog, ubiquitin-conjugating enzyme E2 binding protein, 1       | 25820  |
| SEPHS1  | selenophosphate synthetase 1                                              | 22929  |
| OCRL    | oculocerebrorenal syndrome of Lowe                                        | 4952   |
| RAD54B  | RAD54 homolog B ( <i>S. cerevisiae</i> )                                  | 25788  |
| BCKDHB  | branched chain keto acid dehydrogenase E1, beta polypeptide               | 594    |
| NSF     | N-ethylmaleimide-sensitive factor                                         | 4905   |
| GCLC    | glutamate-cysteine ligase, catalytic subunit                              | 2729   |
| OLAH    | oleoyl-ACP hydrolase                                                      | 55301  |
| CRYZ    | crystallin, zeta (quinone reductase)                                      | 1429   |
| EXOSC6  | exosome component 6                                                       | 118460 |
| NUDT19  | nudix (nucleoside diphosphate linked moiety X)-type motif 19              | 390916 |
| SCLY    | selenocysteine lyase                                                      | 51540  |
| UEVLD   | UEV and lactate/malate dehydrogenase domains                              | 55293  |
| GATM    | glycine amidinotransferase (L-arginine:glycine amidinotransferase)        | 2628   |
| GART    | phosphoribosylglycinamide formyltransferase (...)                         | 2618   |
| ESCO2   | establishment of cohesion 1 homolog 2 ( <i>S. cerevisiae</i> )            | 157570 |
| KIF20B  | kinesin family member 20B                                                 | 9585   |
| LOXL1   | lysyl oxidase-like 1                                                      | 4016   |
| LMO7    | LIM domain 7                                                              | 4008   |
| AKTIP   | AKT interacting protein                                                   | 64400  |
| TRIM23  | tripartite motif-containing 23                                            | 373    |
| DPYSL2  | dihydropyrimidinase-like 2                                                | 1808   |
| LGALS13 | lectin, galactoside-binding, soluble, 13                                  | 29124  |
| YES1    | v-yes-1 Yamaguchi sarcoma viral oncogene homolog 1                        | 7525   |
| CDKN3   | cyclin-dependent kinase inhibitor 3                                       | 1033   |
| LFNG    | LFNG O-fucosylpeptide 3-beta-N-acetylglucosaminyltransferase              | 3955   |
| BCAT1   | branched chain aminotransferase 1, cytosolic                              | 586    |
| RNF144B | ring finger 144B                                                          | 255488 |
| SQLE    | squalene epoxidase                                                        | 6713   |
| ST3GAL5 | ST3 beta-galactoside alpha-2,3-sialyltransferase 5                        | 8869   |

## Supplemental Table 4

### S. Foerster et al: Keratinocyte genes regulated by Th22 supernatants

|          |                                                                                                |       |
|----------|------------------------------------------------------------------------------------------------|-------|
| RFC3     | replication factor C (activator 1) 3, 38kDa                                                    | 5983  |
| GBE1     | glucan (1,4-alpha-), branching enzyme 1                                                        | 2632  |
| AKR1B10  | aldo-keto reductase family 1, member B10 (aldose reductase)                                    | 57016 |
| PGM3     | phosphoglucomutase 3                                                                           | 5238  |
| ERCC6L   | excision repair cross-complementing rodent repair deficiency                                   | 54821 |
| HCCS     | holocytochrome c synthase (cytochrome c heme-lyase)                                            | 3052  |
| MMEL1    | membrane metallo-endopeptidase-like 1                                                          | 79258 |
| GPAM     | glycerol-3-phosphate acyltransferase, mitochondrial                                            | 57678 |
| CTDSPL   | CTD (carboxy-terminal domain, RNA polymerase II, polypeptide A) phosphatase-like               | 10217 |
| SMPD3    | sphingomyelin phosphodiesterase 3, neutral membrane (neutral sphingomyelinase II)              | 55512 |
| CYP3A4   | cytochrome P450, family 3, subfamily A, polypeptide 4                                          | 1576  |
| DHDDS    | dehydrodolichyl diphosphate synthase                                                           | 79947 |
| ADAM9    | ADAM metallopeptidase domain 9 (meltrin gamma)                                                 | 8754  |
| XRCC6BP1 | XRCC6 binding protein 1                                                                        | 91419 |
| ELOVL6   | ELOVL family member 6, elongation of long chain fatty acids (FEN1/Elo2, SUR4/Elo3-like, yeast) | 79071 |
| PCSK5    | proprotein convertase subtilisin/kexin type 5                                                  | 5125  |
| HTRA1    | HtrA serine peptidase 1                                                                        | 5654  |
| SUV420H1 | suppressor of variegation 4-20 homolog 1 (Drosophila)                                          | 51111 |
| CPOX     | coproporphyrinogen oxidase                                                                     | 1371  |
| CROT     | carnitine O-octanoyltransferase                                                                | 54677 |
| USP9Y    | ubiquitin specific peptidase 9, Y-linked (fat facets-like, Drosophila)                         | 8287  |
| UBE2E1   | ubiquitin-conjugating enzyme E2E 1 (UBC4/5 homolog, yeast)                                     | 7324  |
| UBA3     | ubiquitin-like modifier activating enzyme 3                                                    | 9039  |
| UBE2C    | ubiquitin-conjugating enzyme E2C                                                               | 11065 |
| HPGD     | hydroxyprostaglandin dehydrogenase 15-(NAD)                                                    | 3248  |
